# Supplementary material for: The short isoform of extended synaptotagmin-2 controls Ca2+ dynamics in T cells via interaction with STIM1
Source: PubMed Central journal article supplement (PMC7468131; doi:10.1038/s41598-020-71489-7), 2020-09-02
Supplement: 41598_2020_71489_MOESM1_ESM.pdf [file 41598_2020_71489_MOESM1_ESM.pdf]

## SUPPLEMENTAL INFORMATION

### The short isoform of extended synaptotagmin-2 controls Ca<sup>2+</sup> dynamics in T cells via interaction with STIM1

Jin Seok Woo<sup>1</sup>, Zuoming Sun<sup>2</sup>, Sonal Srikanth<sup>1</sup>, and Yousang Gwack<sup>1</sup>

<sup>1</sup>Department of Physiology, David Geffen School of Medicine at UCLA, Los Angeles, CA 90095, USA.

<sup>2</sup>Department of Molecular Imaging & Therapy, Beckman Research Institute of City of Hope, Duarte, CA 91010, USA.

### Supplementary Figure

#### Supplementary Figure 1. Expression of E-Syt2 isoforms in HeLa and Jurkat T cells

(A) Lysates from HeLa, Jurkat, and HEK293T cells overexpressing E-Syt2L or E-Syt2S were subjected to immunoblot analysis for detection of E-Syt2. The molecular weight of the endogenous E-Syt2 isoforms expressed in Jurkat T cells matches those of exogenously expressed E-Syt2L and E-Syt2S proteins without any tag.

(B) Schematic showing domain structure of E-Syt2a and E-Syt2b (E-Syt2L). Gray boxes indicate transmembrane (TM) segments that span the ER membrane. Cytoplasmic region contains synaptotagmin-like mitochondrial lipid-binding protein (SMP) domain and three C2 domains (A, B and C) which are involved in targeting proteins to cell membranes. Bar graph shows mRNA levels of *ESYT2a* and *ESYT2b* in HeLa and Jurkat cells. E-Syt2b is synonymous with E-Syt2L. \* $p < 0.05$ , N.D. – not detected.

(C) Measurement of SOCE in control and DKO Jurkat T cells after TCR cross-linking with anti-CD3 antibody and treatment with 0.5  $\mu$ M ionomycin in the presence of external solution containing 2 mM Ca<sup>2+</sup>. Traces show averaged SOCE responses from 30 to 50 cells, and the bar graph shows averaged response  $\pm$  S.E.M. from three independent experiments. \* $p < 0.05$ , \*\* $p < 0.005$ .

#### Supplementary Figure 2. Deficiency of E-Syts impairs the NFAT pathway without influencing other proximal TCR signaling pathways

(A) Control and DKO Jurkat T cells were stimulated with soluble anti-CD3 antibody (10  $\mu$ g/ml) and cross-linking antibody (20  $\mu$ g/ml) for indicated times, and lysates were analyzed by immunoblotting for

detection of phosphorylated or total ZAP70, ERK, p38, and JNK proteins.  $\beta$ -actin was used as a loading control. Data are representative of at least three independent experiments.

**(B)** Representative confocal images of control and DKO Jurkat T cells expressing GFP-PLC $\delta$ -PH and ORAI1-mCherry (a marker for the plasma membrane). Middle panel shows representative line scans (lines depicted in Merge panels) showing overlap between PLC $\delta$ -PH and ORAI1 signals. Bar graph on the right shows averaged ratio ( $\pm$  S.E.M.) of PLC $\delta$ -PH signal intensity on the PM versus the entire cell. N.S. – not significant.

### **Supplementary Figure 3. Interaction between E-Syt2S and STIM1**

**(A)** Interaction of E-Syts with ORAI1. FLAG-immunoprecipitates from lysates of HEK293T cells expressing FLAG-tagged E-Syt1, E-Syt2L, or E-Syt2S together with His-tagged ORAI1 were blotted for detection of the indicated proteins. Cells were treated with thapsigargin before lysis (1  $\mu$ M TG for 10 mins).

**(B)** Identification of domains involved in binding of STIM1 with E-Syt2S. Recombinant GST-fused fragments of STIM1 were incubated with lysates of HEK293T cells expressing FLAG-tagged E-Syt1 and E-Syt2S and immunoblotted with anti-FLAG antibody (top). Purified GST-fused fragments of E-Syt2S were incubated with lysates of HEK293T cells expressing His-tagged STIM1 and immunoblotted with anti-His antibody (bottom).

**(C)** Interaction of the N-terminus of E-Syt2L or E-Syt2S with E-Syt2 fragments. GST-fused fragments of E-Syt2 were incubated with lysates of HEK293T cells expressing GFP-tagged N-terminus of E-Syt2L (E2LN) or E-Syt2S (E2SN) and immunoblotted with anti-GFP antibody.

## Supplementary Table

### List of primers, shRNAs, and sgRNAs used in this study

| Gene name                              | Forward Primer                            | Reverse Primer                            | Comments                                                          |
|----------------------------------------|-------------------------------------------|-------------------------------------------|-------------------------------------------------------------------|
| hE-Syt1_shRNA (mature antisense)       | GAGACTTATGAGGTGATGGT<br>A                 |                                           | In pLKO.1 vector                                                  |
| hE-Syt2_shRNA (mature antisense)       | GCTCGCAGAGAAACAAGCTT<br>A                 |                                           | In pLKO.1 vector                                                  |
| hE-Syt1_pLentiguide_sgRNA              | CACCGCCCTAGCCATTGCGC<br>ATCAT             | AACATGATGCGCAATGGCTA<br>GGGC              | sgRNA targeting human E-Syt1                                      |
| hE-Syt2_pLentiguide_sgRNA              | CACCGGCTGCTGCCCGTGTA<br>CGCGC             | AACGCGCGTACACGGGCAG<br>CAGCC              | sgRNA targeting human E-Syt2                                      |
| pMSCV-CITE-eGFP-PGK-Puro_hE-Syt1       | GCGCGGCCGCATGGAGCGA<br>TCTCCAGGA          | GCGCGGCCGCGGAGCTGCC<br>CTTGTCCTT          | Sub-cloned in pMSCV-CITE-eGFP-PGK-Puro using NotI site            |
| pMSCV-CITE-eGFP-PGK-Puro_hE-Syt2L      | CCCTCGAGATGACGCCACCG<br>TCCCGG            | CGGAATTCTGTCATCGCCTG<br>AGGCCT            | Sub-cloned in pMSCV-CITE-eGFP-PGK-Puro using XhoI and EcoRI sites |
| pMSCV-CITE-eGFP-PGK-Puro_hE-Syt2S      | CGCTCGAGATGAGCGGCGC<br>CCGGGGC            | CGGAATTCTGTCATCGCCTG<br>AGGCCT            | Sub-cloned in pMSCV-CITE-eGFP-PGK-Puro using XhoI and EcoRI sites |
| pEGFPN1_hE-Syt2L                       | CCGCTCGAGATGACGCCACC<br>GTCCCGG           | CGGAATTCGTGTCATCGCCT<br>GAGGCCT           | Sub-cloned in pEGFPN1 using XhoI and EcoRI sites                  |
| pEGFPN1_hE-Syt2LN                      | GCCTCGAGATGACGCCACC<br>GTCCCGG            | GCGAATTCGCTCCACGCTCA<br>GCACGCC           | Sub-cloned in pEGFPN1 using XhoI and EcoRI sites                  |
| pEGFPN1_hE-Syt2SN                      | GCCTCGAGATGAGCGGCGC<br>CCGGGGC            | GCGAATTCGCTCCACGCTCA<br>GCACGCC           | Sub-cloned in pEGFPN1 using XhoI and EcoRI sites                  |
| pMSCV-CITE-eGFP-PGK-Puro_hE-Syt2L_M49L | GCGCGGCACTGCGGGGCGC<br>TGAGCGGCGCCCGGGGCG | CGCCCCGGGCGCCGCTCAG<br>CGCCCCGCAGTGCCGCGC | Site directed mutagenesis                                         |
| pGEXT4-1_hE-Syt2_LN                    | GCGAATTCATGACGCCACCG<br>TCCCGG            | GCCTCGAGCTATCTTTCAGT<br>GTCTGGAAA         | Sub-cloned in pGEX4T-1 using EcoRI and XhoI sites                 |
| pGEXT4-1_hE-Syt2_SN                    | GCGAATTCATGAGCGGCGCC<br>CGGGGC            | GCCTCGAGCTATCTTTCAGT<br>GTCTGGAAA         | Sub-cloned in pGEX4T-1 using EcoRI and XhoI sites                 |
| pGEXT4-1_hE-Syt2_SMP                   | GCGAATTCGCAGAATGGCTA<br>AATAAG            | GCCTCGAGCTAGACAAGTGG<br>AACGGTGAT         | Sub-cloned in pGEX4T-1 using EcoRI and XhoI                       |

|                         |                                 |                                   | sites                                                   |
|-------------------------|---------------------------------|-----------------------------------|---------------------------------------------------------|
| pGEXT4-1_hE-Syt2_C2A/B  | GCGAATTCGGTGTTCTAAGG<br>ATACAT  | GCCTCGAGCTATGGACCCGA<br>GTTACTGAG | Sub-cloned in pGEX4T-1<br>using EcoRI and XhoI<br>sites |
| pGEXT4-1_hE-Syt2_Linker | GCGAATTC AACAGCACCATC<br>AAGATG | GCCTCGAGCTAAGACTGTCC<br>CAGGGTCGT | Sub-cloned in pGEX4T-1<br>using EcoRI and XhoI<br>sites |
| pGEXT4-1_hE-Syt2_C2C    | GCGAATTC CCACTGGGGCAG<br>ATCCAG | GCCTCGAGCTACGTGAGGTC<br>ATACCACTG | Sub-cloned in pGEX4T-1<br>using EcoRI and XhoI<br>sites |
| hE-Syt2a                | CGAGGCCACAGGCAAAG               | ACGCGCTCCTCGTCTTC                 | qPCR primer                                             |
| hE-Syt2b                | CTGCTGCTGCCC GTGTA              | ACGCGCTCCTCGTCTTC                 | qPCR primer                                             |
| hE-Syt1                 | CTGGCGGTGCTGACTTCATT            | CTCGAAGGCTCCGTTCTTTC<br>T         | qPCR primer                                             |
| hE-Syt2                 | CAA ACTATCTGGTGCTTCCC<br>AA     | GGAAACCGCAACTGAGCTAT<br>T         | qPCR primer                                             |
| hGAPDH                  | ATCGTGGAAGGACTCATGAC<br>CACA    | AGAGGCAGGGATGATGTTCT<br>GGA       | qPCR primer                                             |

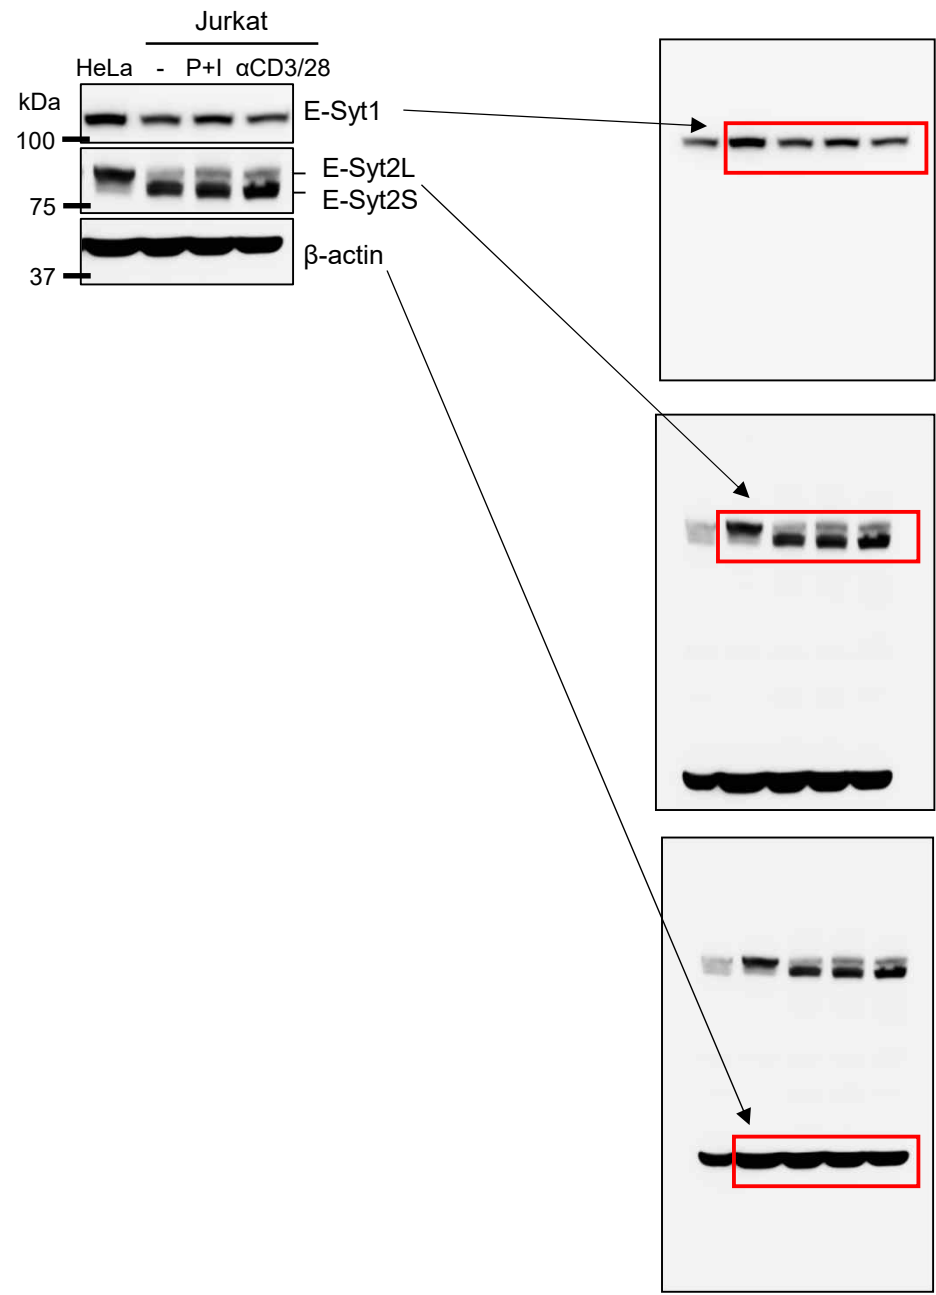

**Supplementary Figure 4.** Full-length blots of cropped blots from Figure 1B in the main figure.

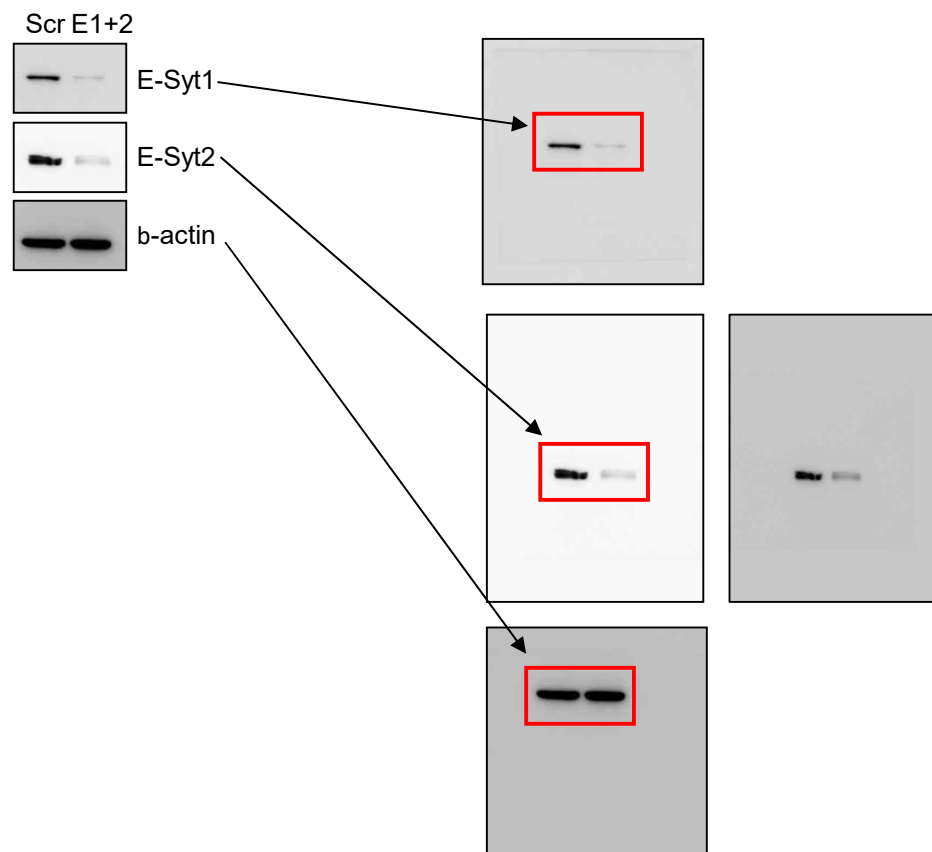

**Supplementary Figure 5.** Full-length blots of cropped blots from Figure 1C in the main figure.

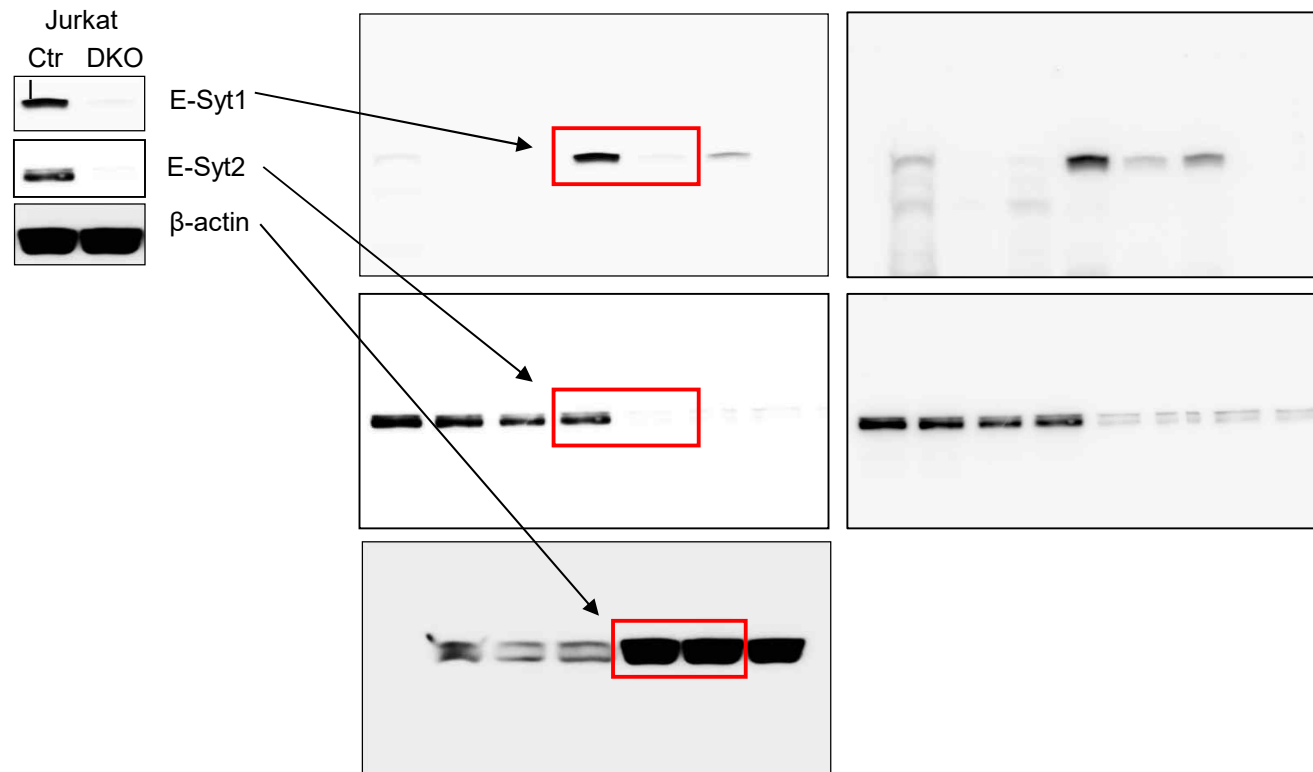

**Supplementary Figure 6.** Full-length blots of cropped blots from Figure 1E in the main figure.

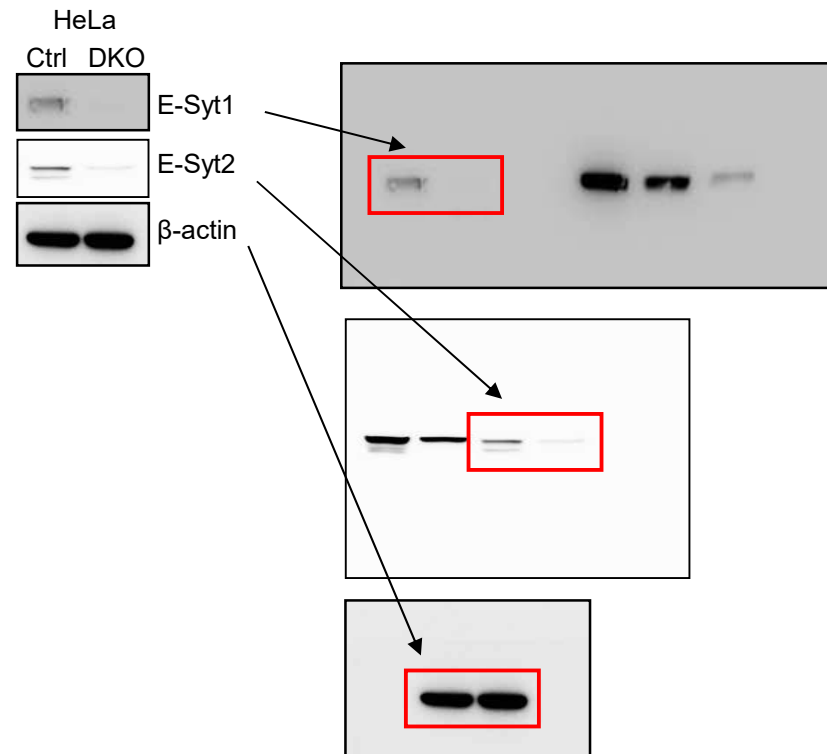

**Supplementary Figure 6 (continued).** Full-length blots of cropped blots from Figure 1E in the main figure.



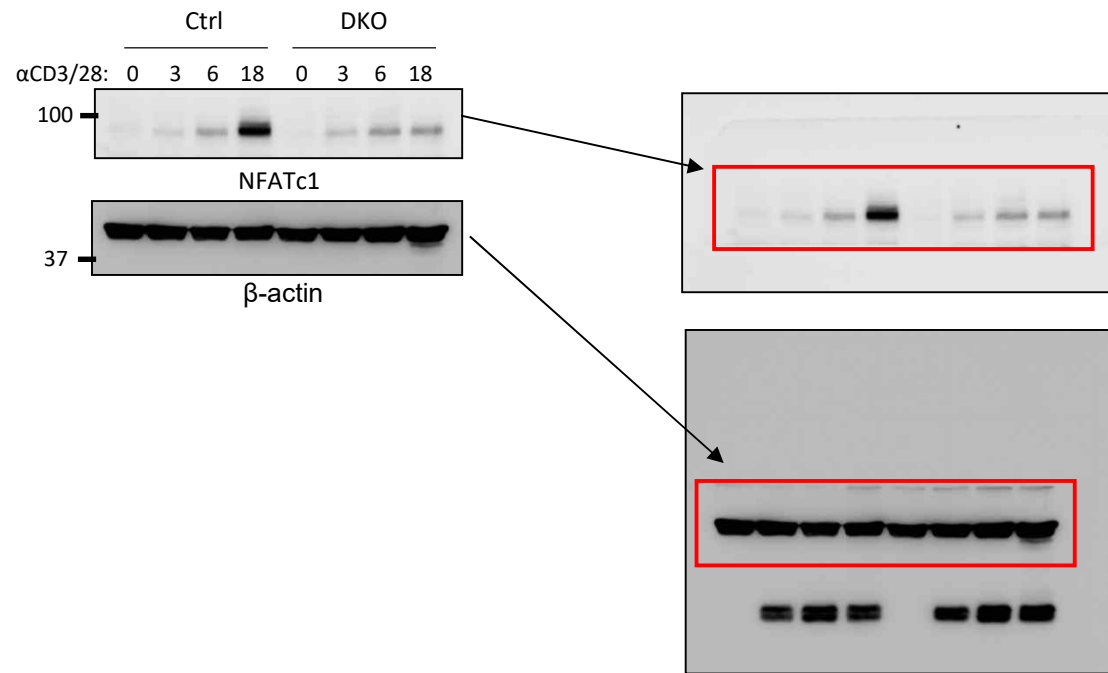

**Supplementary Figure 7.** Full-length blots of cropped blots from Figure 2A in the main figure.

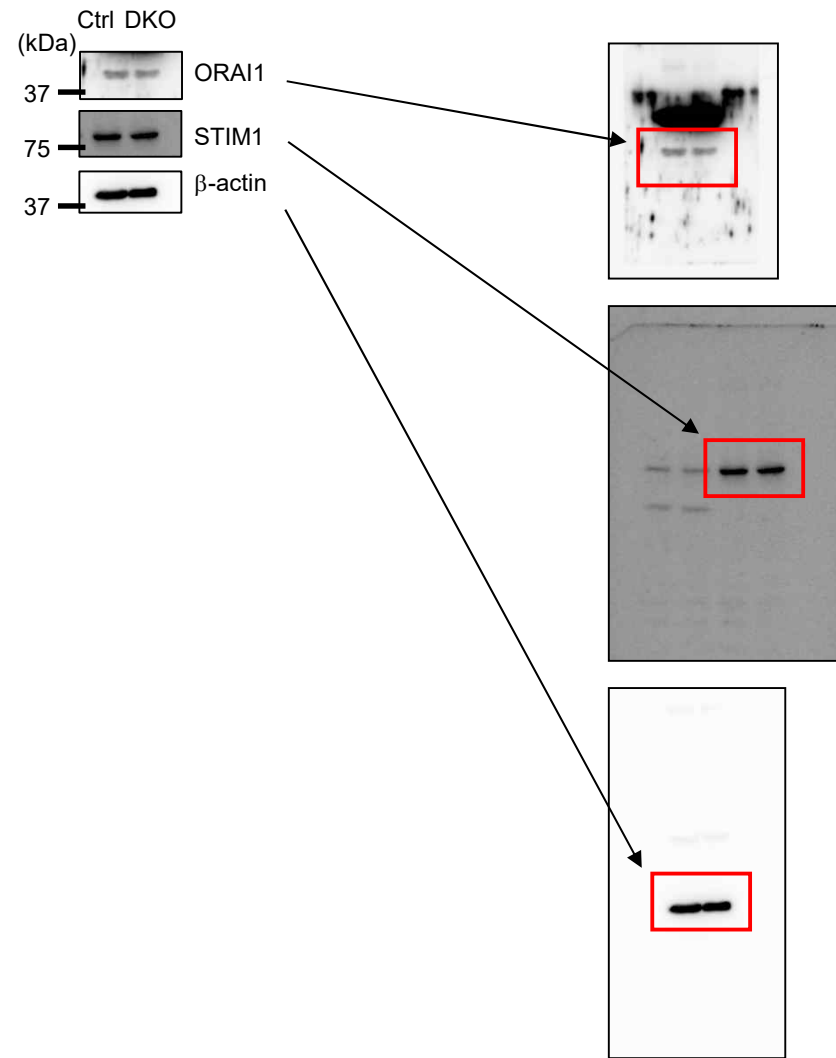

**Supplementary Figure 8.** Full-length blots of cropped blots from Figure 4C in the main figure.

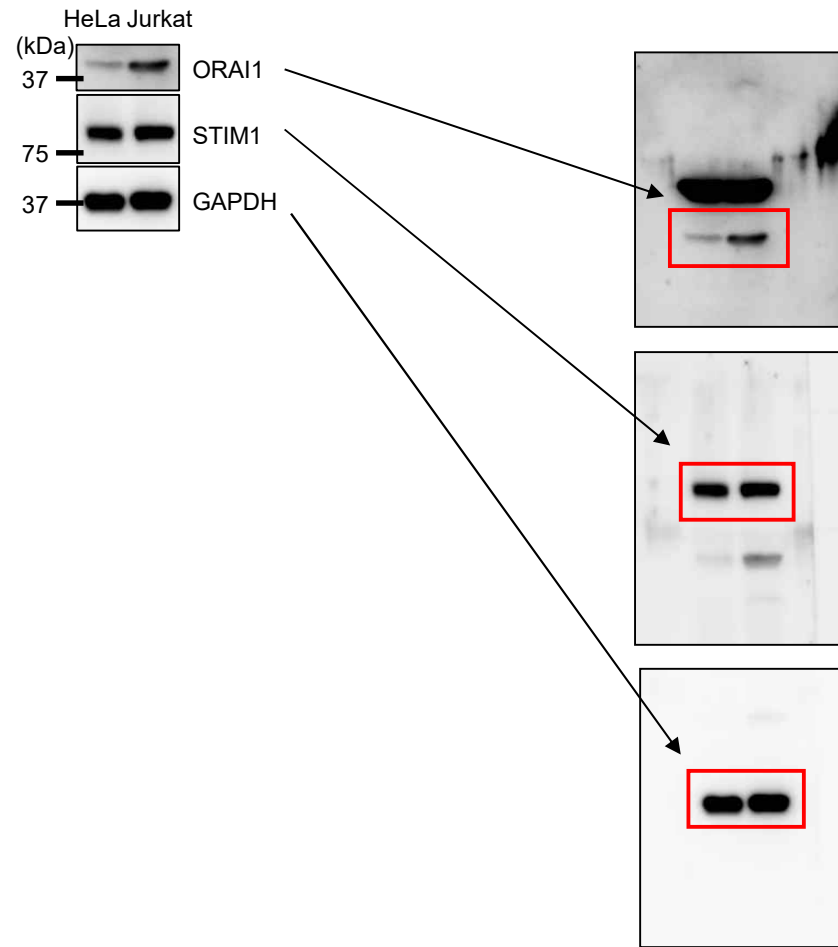

**Supplementary Figure 9.** Full-length blots of cropped blots from Figure 4D in the main figure.

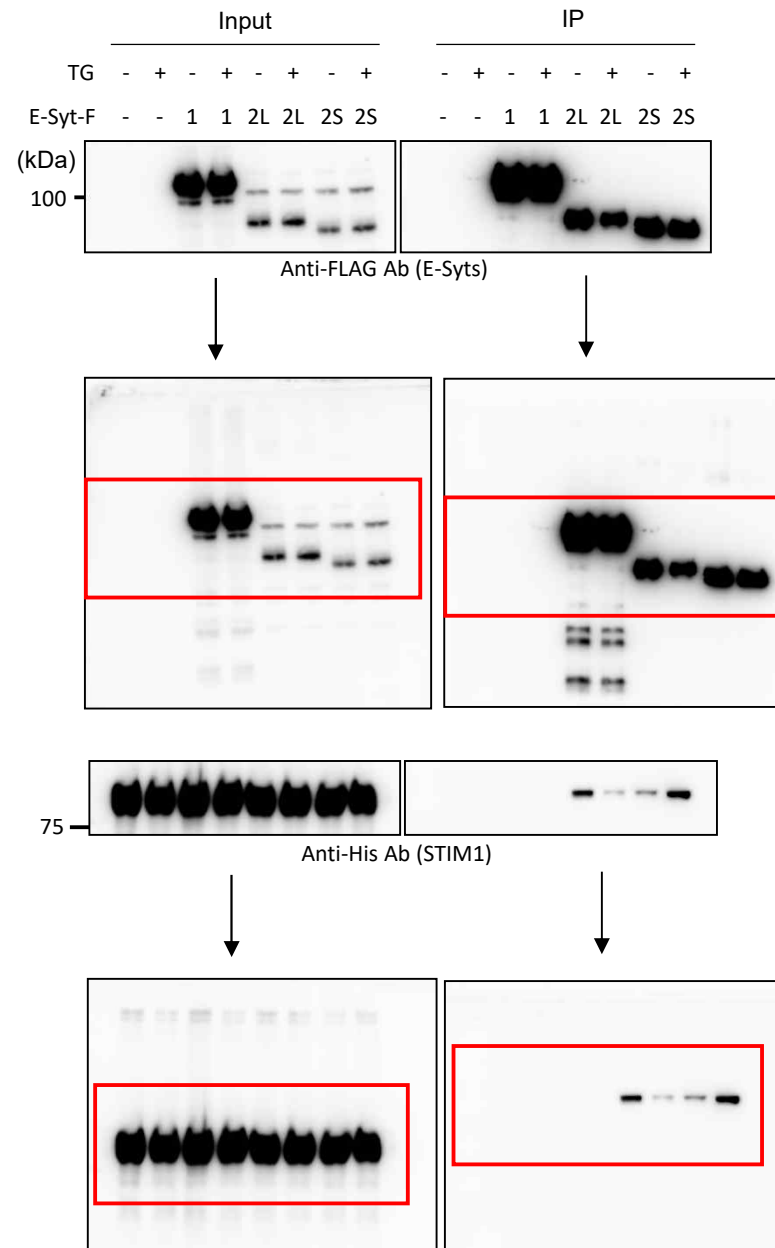

**Supplementary Figure 10.** Full-length blots of cropped blots from Figure 5A in the main figure.

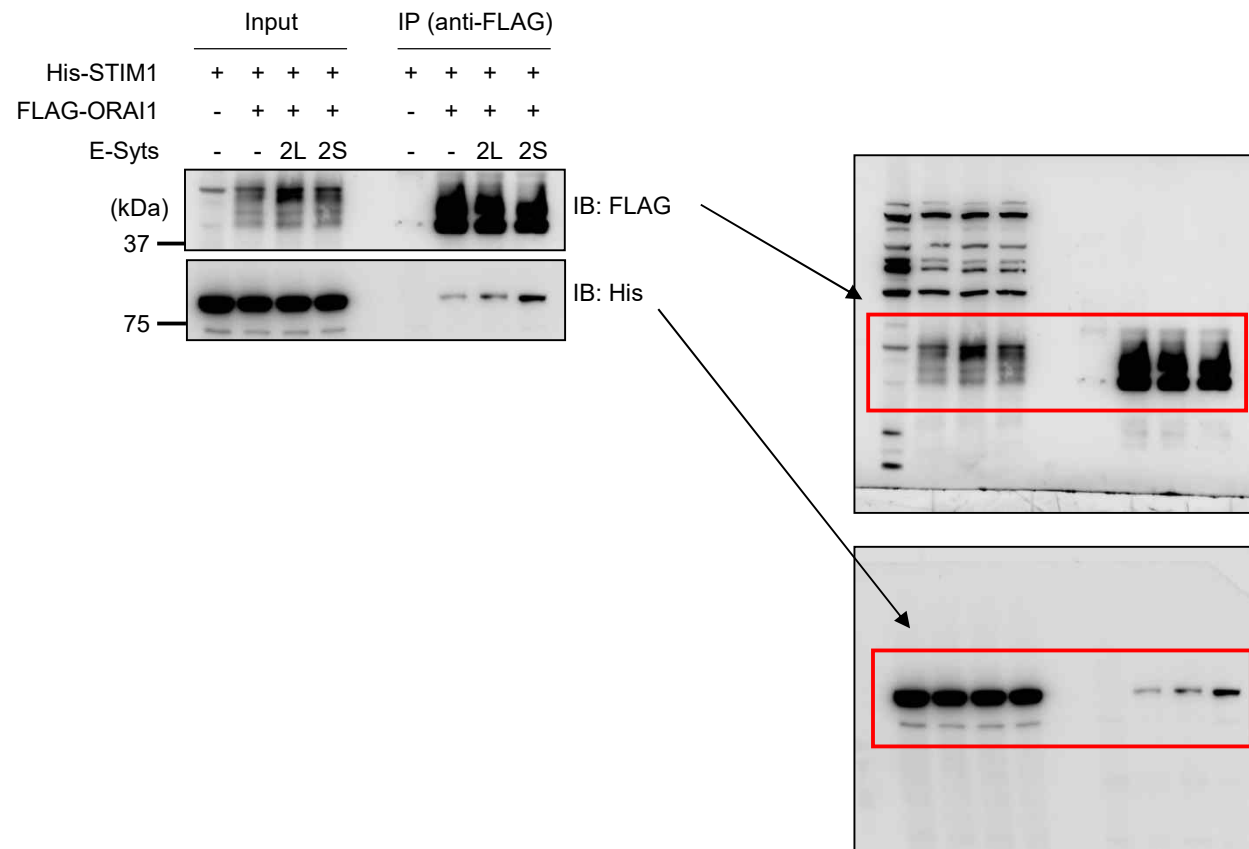

**Supplementary Figure 11.** Full-length blots of cropped blots from Figure 5B in the main figure.

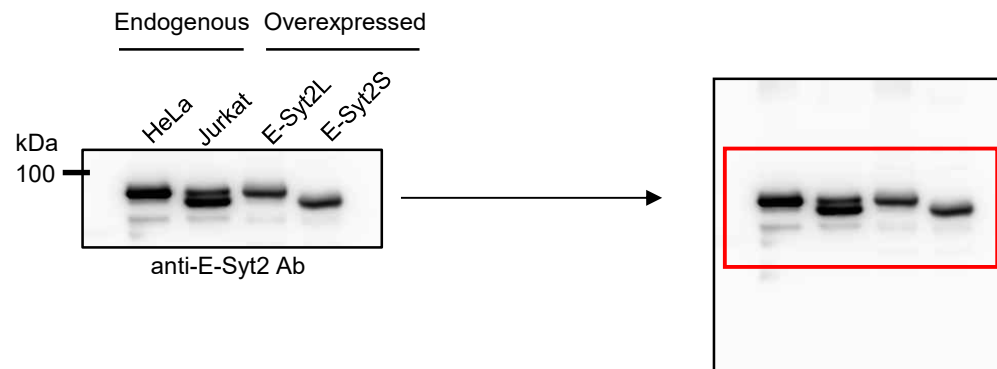

**Supplementary Figure 12.** Full-length blots of cropped blots from Supplementary Figure 1A.

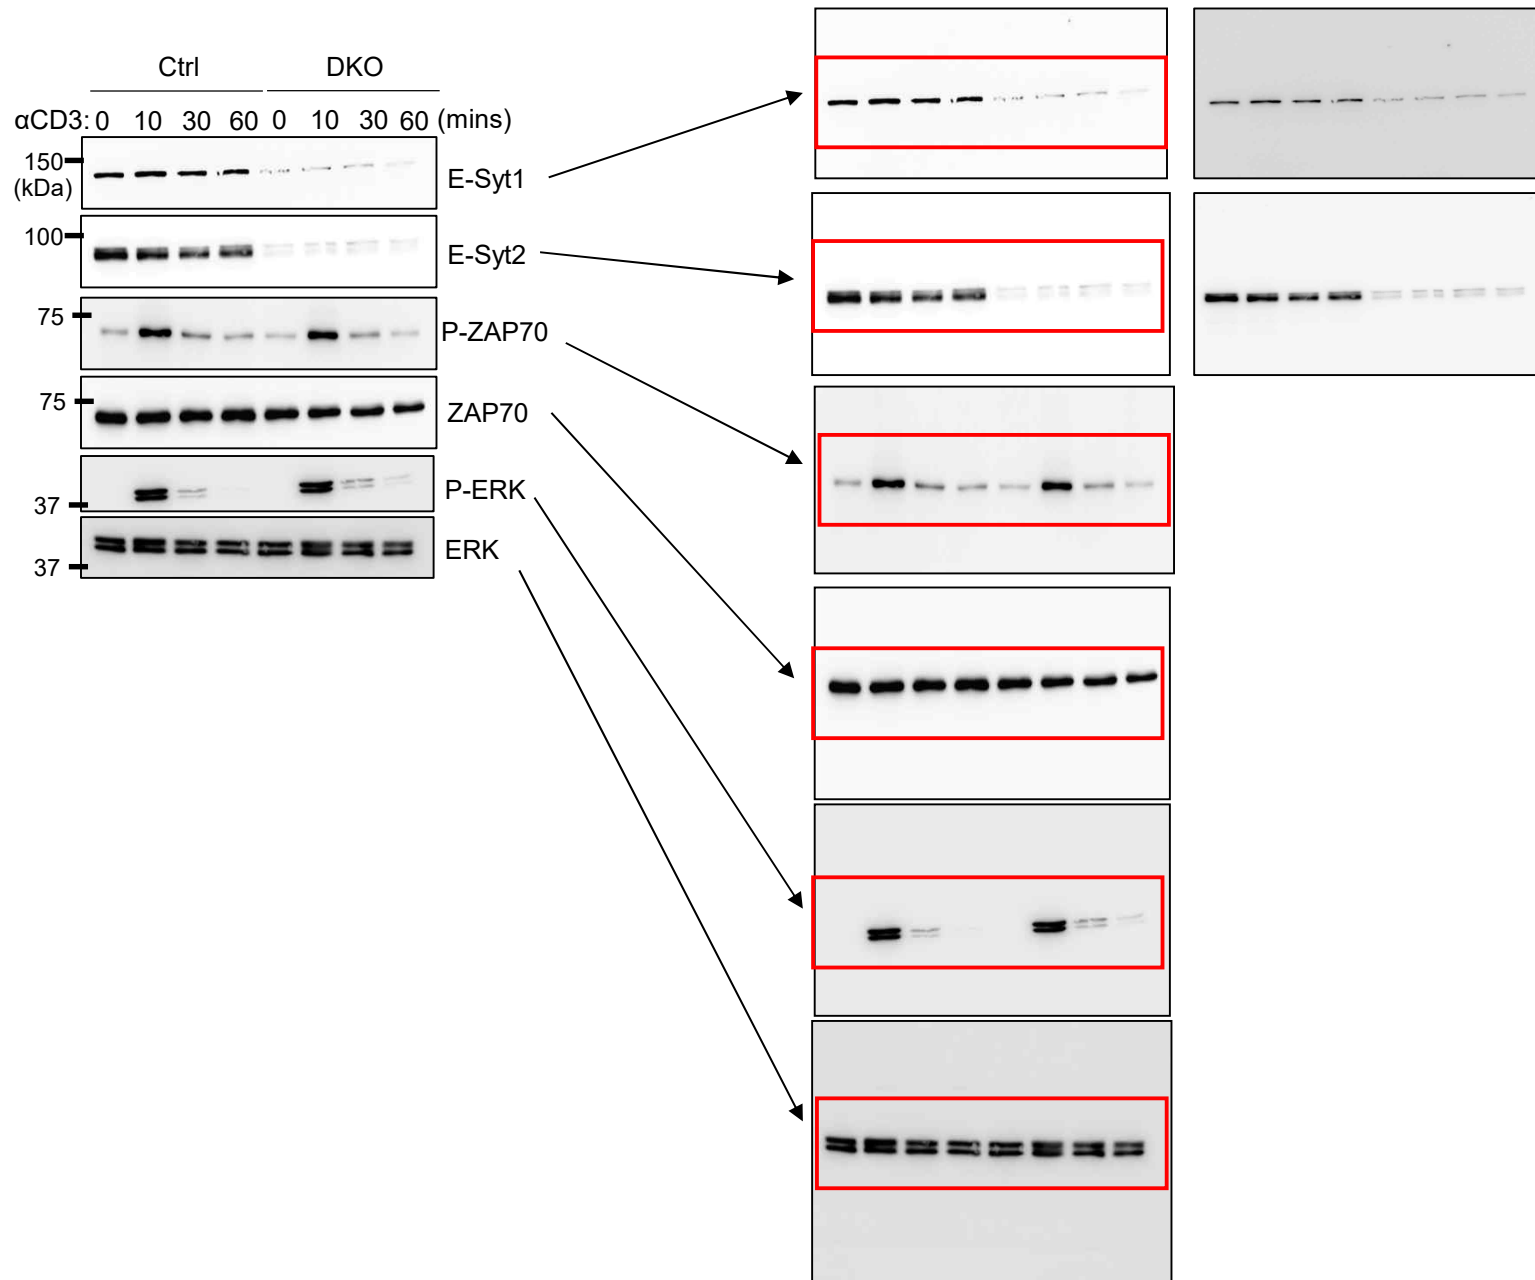

**Supplementary Figure 13.** Full-length blots of cropped blots from Supplementary Figure 2A.

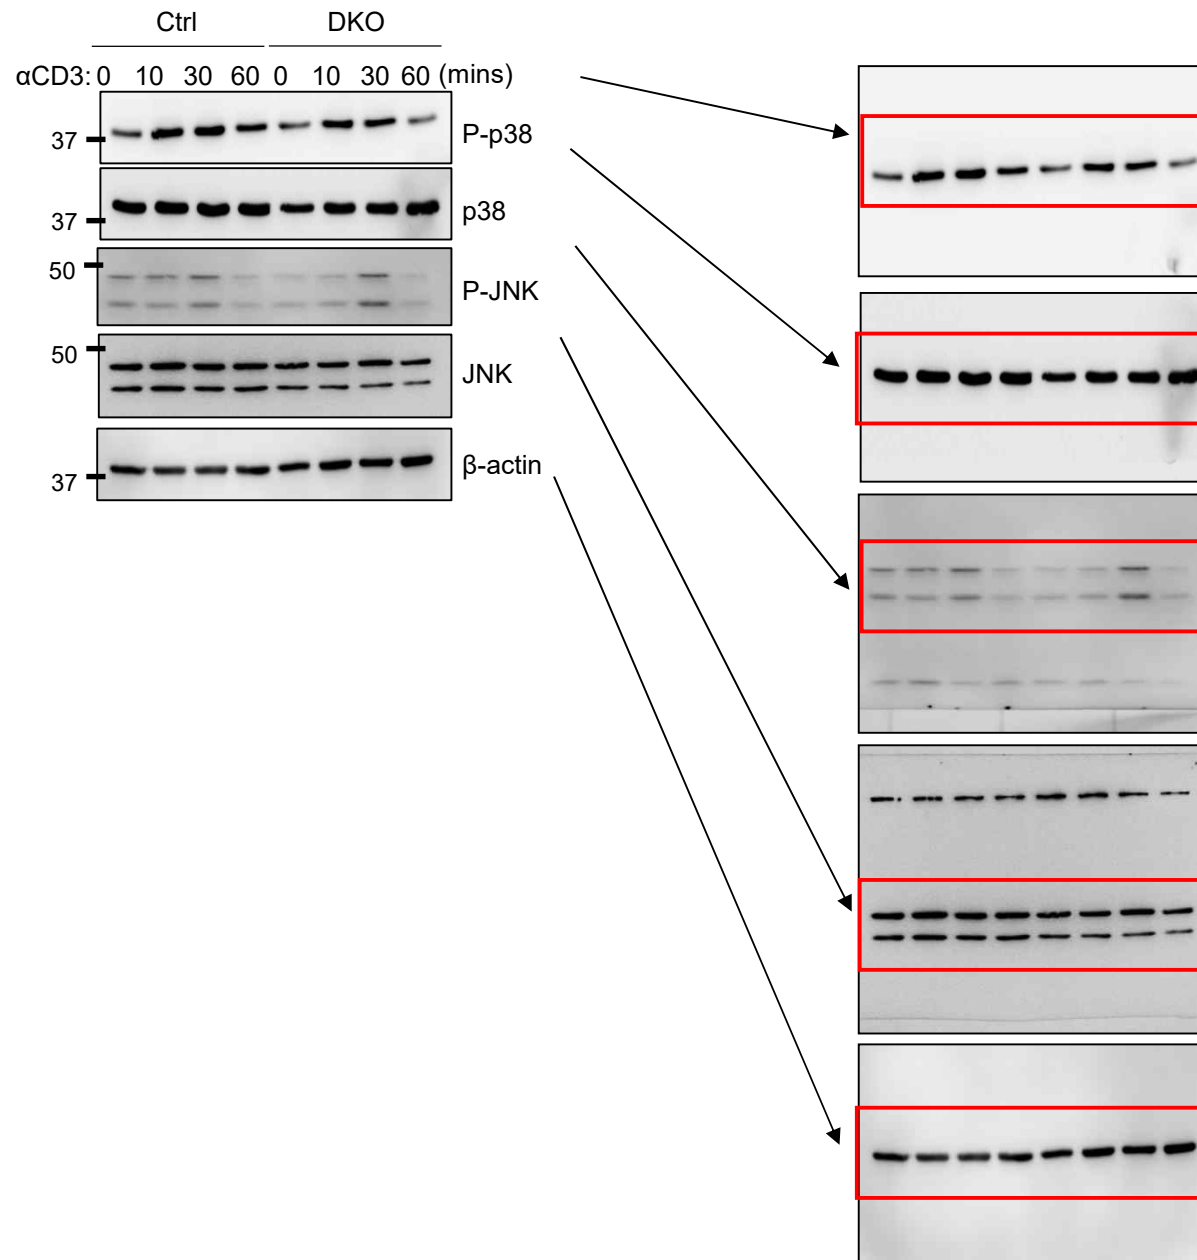

**Supplementary Figure 13 (continued).** Full-length blots of cropped blots from Supplementary Figure 2A.



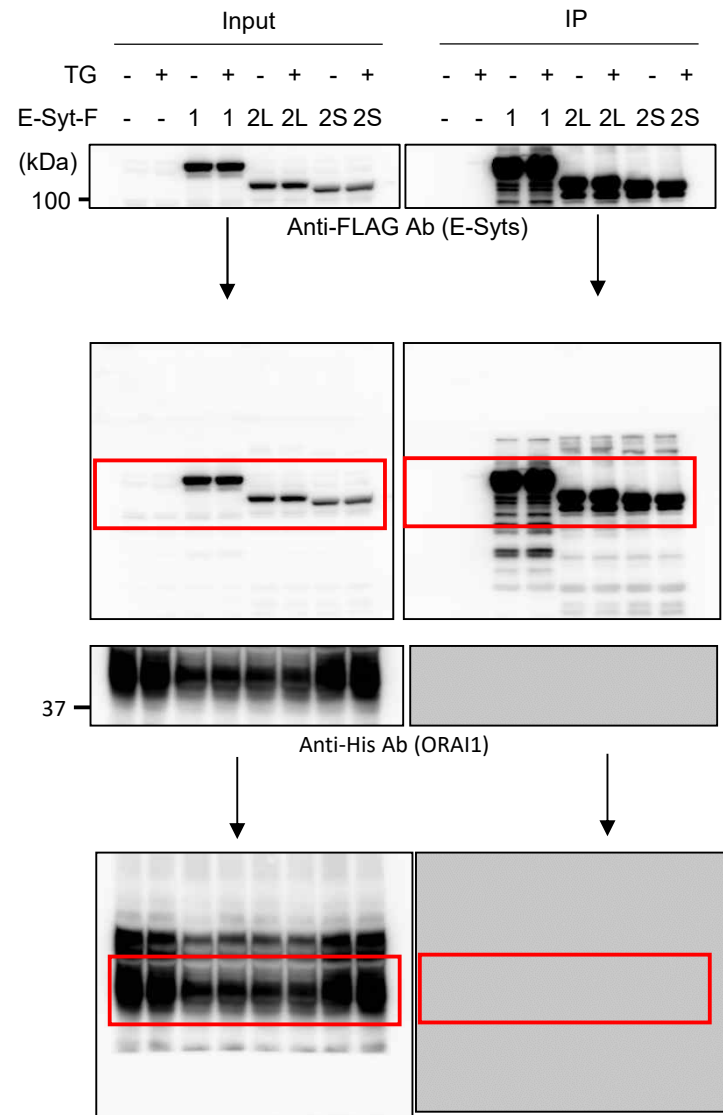

**Supplementary Figure 14.** Full-length blots of cropped blots from Supplementary Figure 3A.

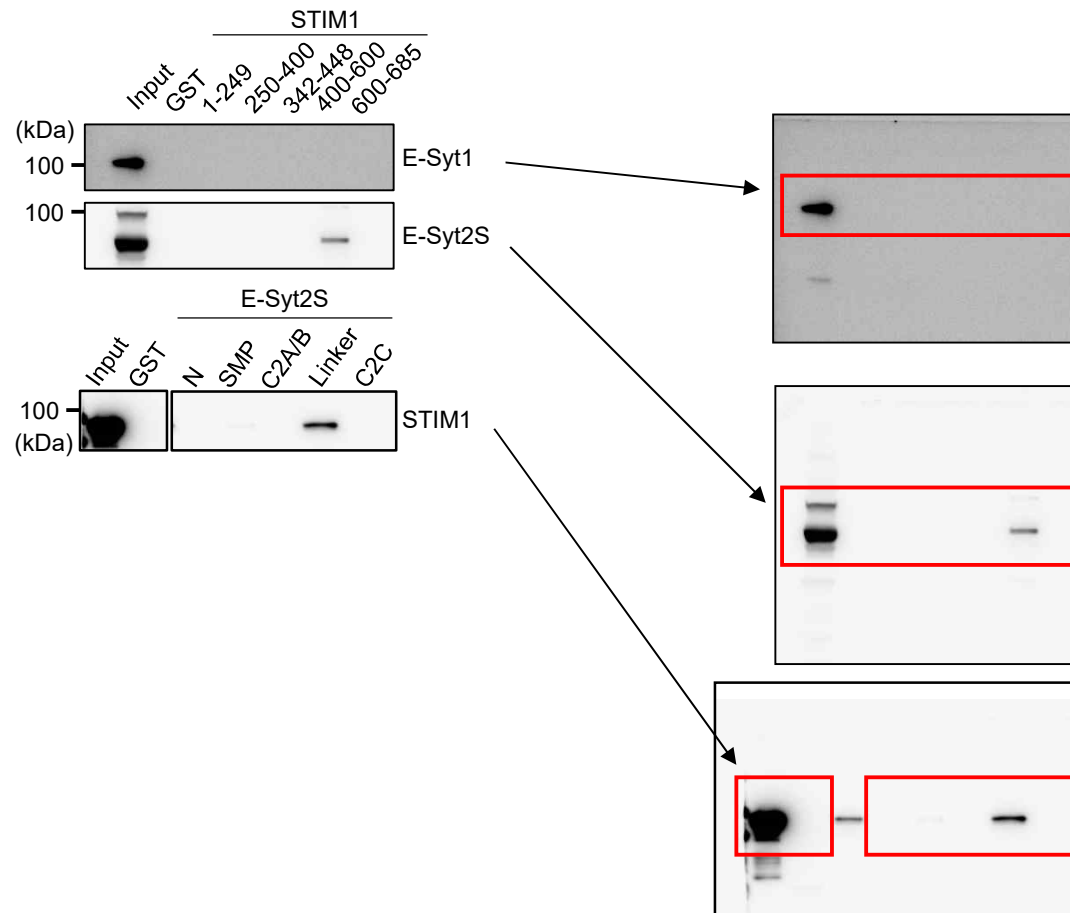

**Supplementary Figure 15.** Full-length blots of cropped blots from Supplementary Figure 3B.

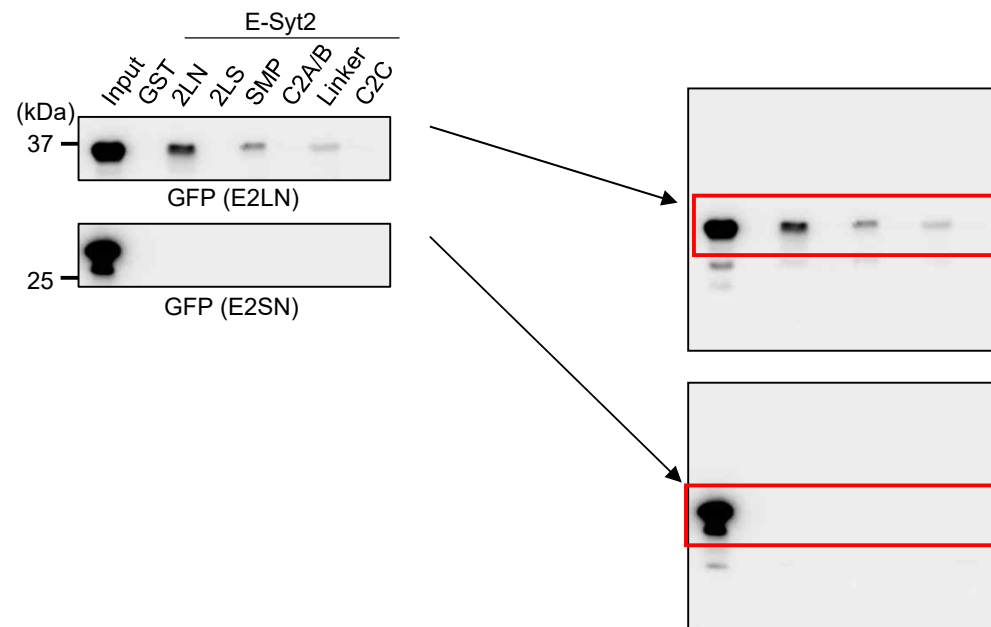

**Supplementary Figure 16.** Full-length blots of cropped blots from Supplementary Figure 3C.
