# Supplementary material for: The short isoform of extended synaptotagmin-2 controls Ca2+ dynamics in T cells via interaction with STIM1
Source: PubMed Central journal article supplement (PMC7468131; doi:10.1038/s41598-020-71489-7), 2020-09-02

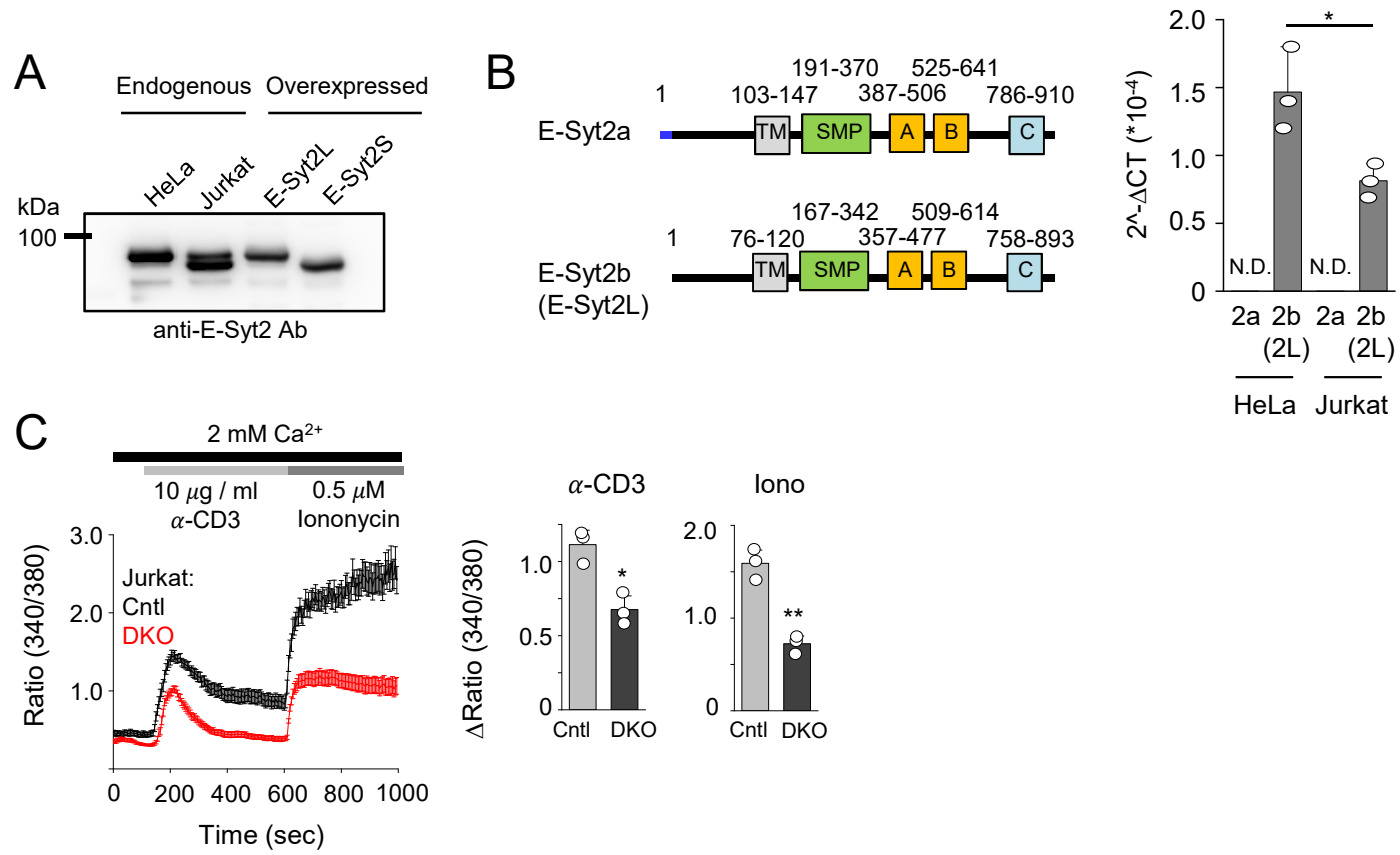

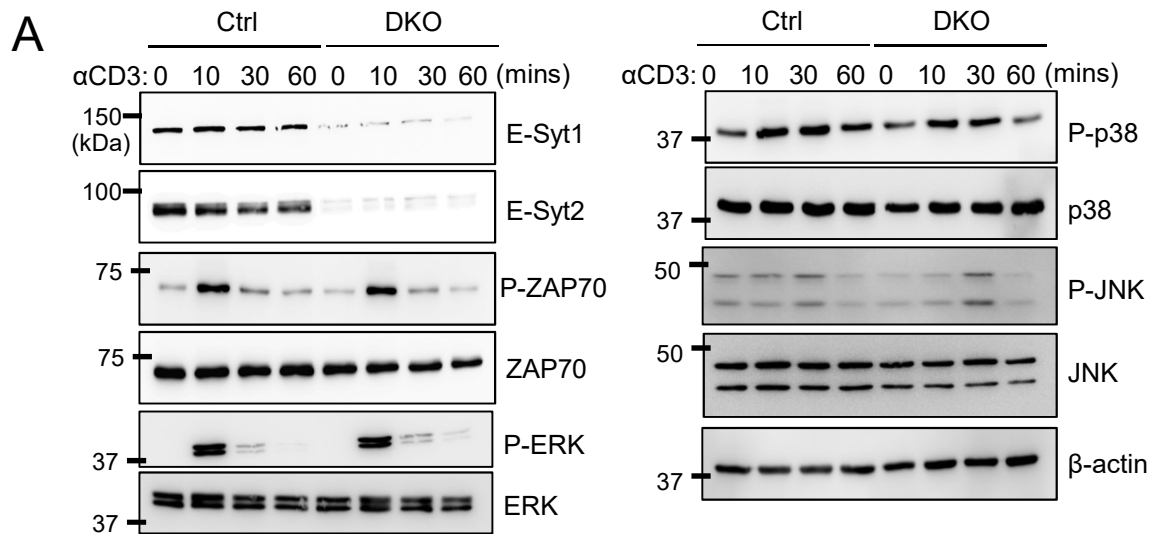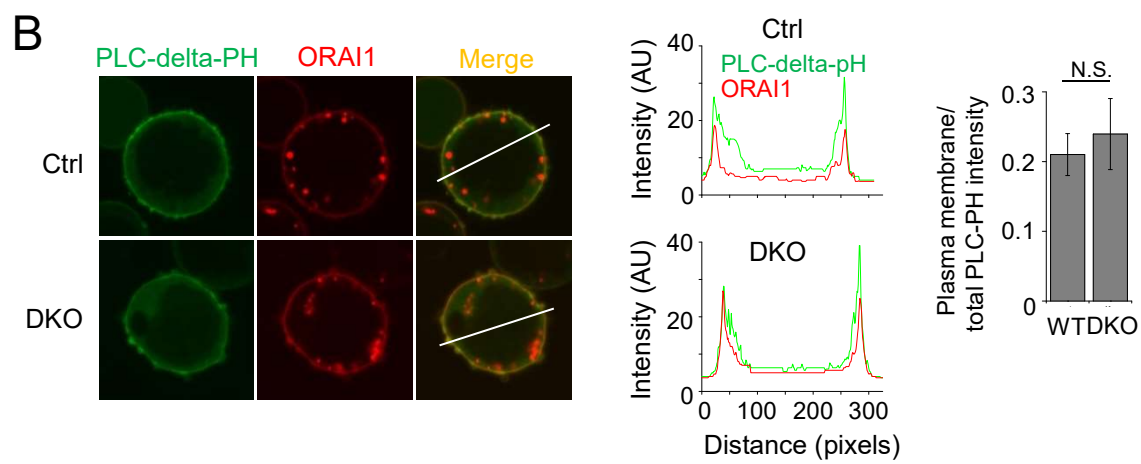

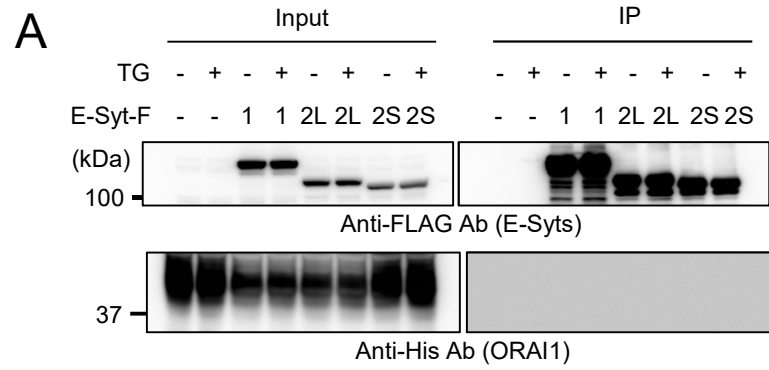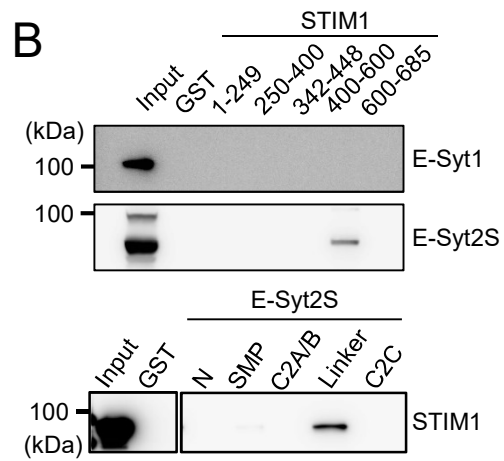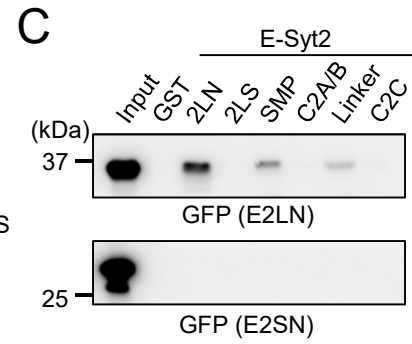

Supplement: 41598_2020_71489_MOESM2_ESM.pdf [file 41598_2020_71489_MOESM2_ESM.pdf]
